# Supplementary material for: HoxBlinc lncRNA reprograms CTCF-independent TADs to drive leukemic transcription and HSC dysregulation in NUP98-rearranged leukemia
Source: JCI journal article supplement (doi:10.1172/jci184743), 2025-01-30

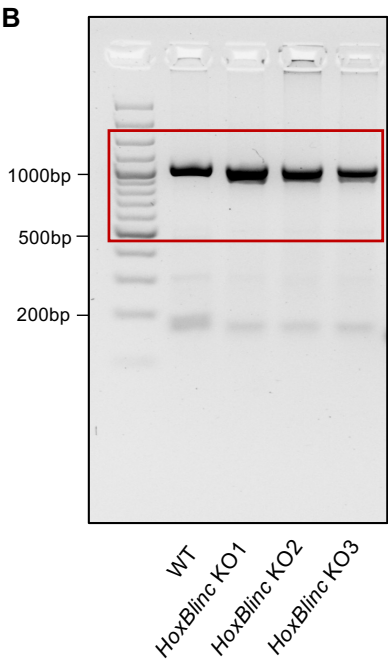

Supplement: sd2 [file 2]
